# Supplementary material for: ZnSe:Te/ZnSeS/ZnS nanocrystals: an access to cadmium-free pure-blue quantum-dot light-emitting diodes
Source: Royal Society of Chemistry journal article supplement (doi:10.1039/d0nr01019g), 2020-01-01
Supplement: d0nr01019g1.pdf [file d0nr01019g1.pdf]

### Electronic Supplementary Materials

#### **ZnSe:Te/ZnSeS/ZnS Nanocrystals: An Access to Cadmium-Free Pure-Blue Quantum-Dot Light-Emitting Diodes**

Zhen Bao<sup>a†</sup>, Zhen-Feng Jiang<sup>b†</sup>, Qiang Su<sup>c†</sup>, Hsin-Di Chiu<sup>b</sup>, Heesun Yang<sup>\*d</sup>, Shuming Chen<sup>\*c</sup>, Ren-Jei Chung<sup>\*b</sup>, and Ru-Shi Liu<sup>\*aef</sup>

<sup>a</sup>Department of Chemistry, National Taiwan University, Taipei 106, Taiwan

<sup>b</sup>Department of Chemical Engineering and Biotechnology, National Taipei University of Technology, Taipei 106, Taiwan

<sup>c</sup>Department of Electrical and Electronic Engineering, Southern University of Science and Technology, Shenzhen 518055, China

<sup>d</sup>Department of Materials Science and Engineering, Hongik University, Seoul 04066, Korea

<sup>e</sup>Advanced Research Centre of Green Materials Science and Technology, National Taiwan University, Taipei 106, Taiwan

<sup>f</sup>Department of Mechanical Engineering and Graduate Institute of Manufacturing Technology, National Taipei University of Technology, Taipei 106, Taiwan

## Figures and tables

**Tab. S1** Summary of three-order multiexponential fitting parameters the for time-resolved PL decays of ZnSe:xTe/ZnSeS/ZnS QDs.

| Te/Se ratio | A <sub>1</sub> (%) | τ <sub>1</sub> (ns) | A <sub>2</sub> (%) | τ <sub>2</sub> (ns) | A <sub>3</sub> (%) | τ <sub>3</sub> (ns) | τ <sub>avg</sub> (ns) |
|-------------|--------------------|---------------------|--------------------|---------------------|--------------------|---------------------|-----------------------|
| 3.0%        | 46.4               | 2.6                 | 40.9               | 12.2                | 12.7               | 36.6                | 10.8                  |
| 3.3%        | 59.5               | 1.9                 | 30.1               | 9.9                 | 10.4               | 32.8                | 7.5                   |
| 3.7%        | 48.7               | 2.2                 | 41.1               | 9.9                 | 10.2               | 31.2                | 8.3                   |

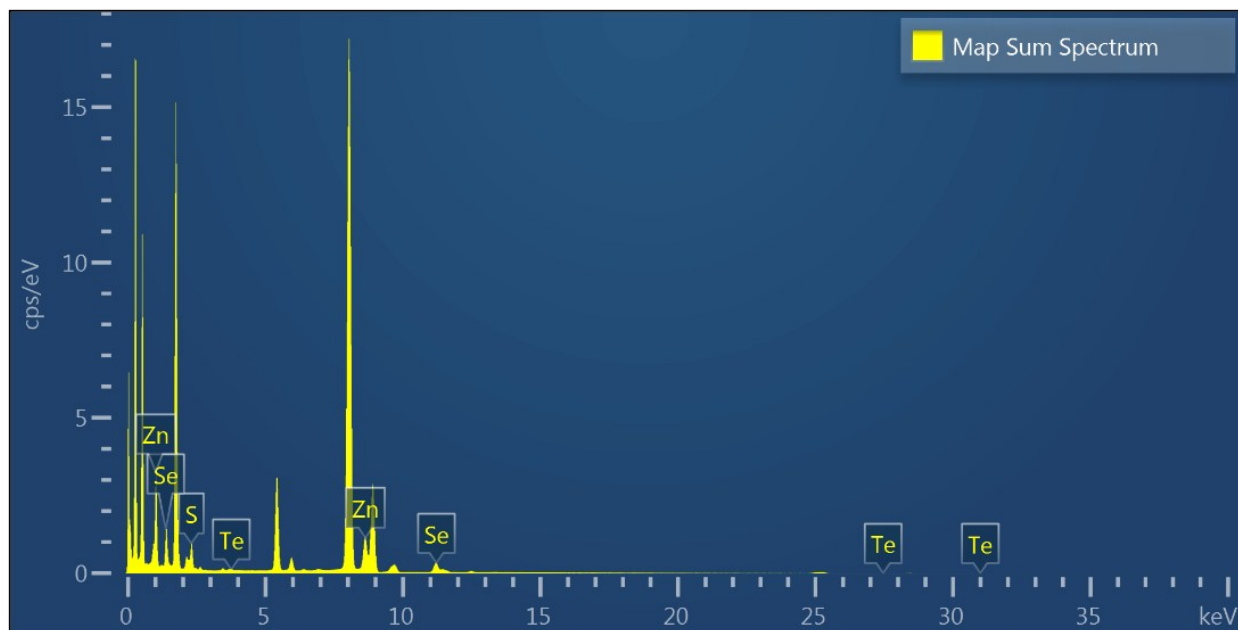

**Fig. S1.** Elemental composition and atomic ratios of ZnSe:0.03Te/ZnSeS/ZnS as determined by EDS.

**Tab. S2.** EDS elemental ratio of Zn, Se, S, and Te.

| Element      | Zn (%) | Se (%) | S (%) | Te (%) | Total (%) |
|--------------|--------|--------|-------|--------|-----------|
| Atomic ratio | 44.4   | 21.8   | 30.9  | 2.9    | 100.0     |

**Tab. S3.** Summary of different structure QLEDs fabricated by ZnSe:0.03Te/ZnSeS/ZnS.

| Device structure   | PL (nm) | EL (nm) | Von [V] | Max. EQE (%) | Max. CE (cd/A) | Max. PE (lm/W) | Max. L (cd/m <sup>2</sup> ) |
|--------------------|---------|---------|---------|--------------|----------------|----------------|-----------------------------|
| TFB                | 450     | 452     | 13.75   | 0.12         | 0.07           | 0.01           | 96                          |
| PVK                | 450     | 451     | 12.1    | 0.18         | 0.02           | 0.01           | 67                          |
| PVK + 10% TFB      | 450     | 455     | 6       | 0.33         | 0.34           | 0.15           | 261                         |
| Inverted structure | 450     | 472     | 8.8     | 0.07         | 0.23           | 0.11           | 57                          |

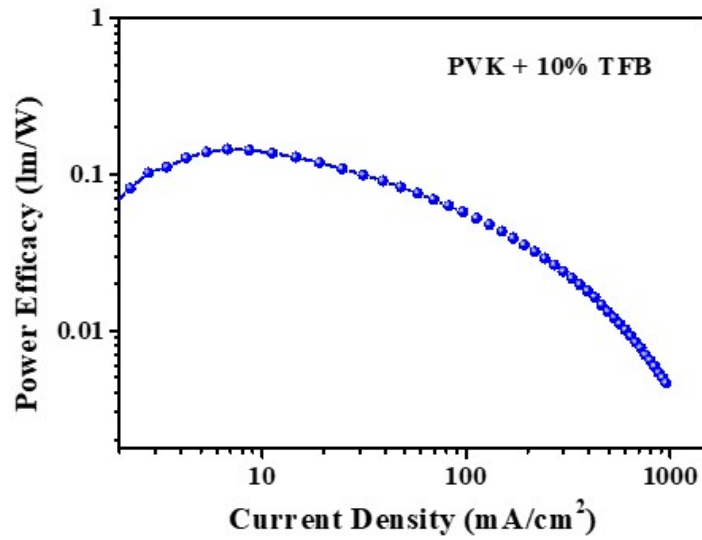

**Fig. S2.** Power efficacy–current density curve of the ZnSe:0.03Te/ZnSeS/ZnS fabricated QLED device with a mixed hole-transfer layer of 10%TFB in PVK.

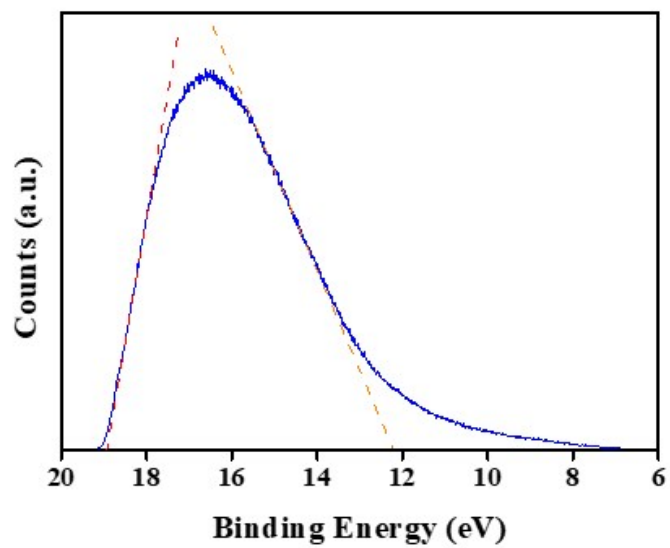

**Fig. S3.** UPS spectrum of the ZnSe:0.03Te/ZnSeS/ZnS QDs.

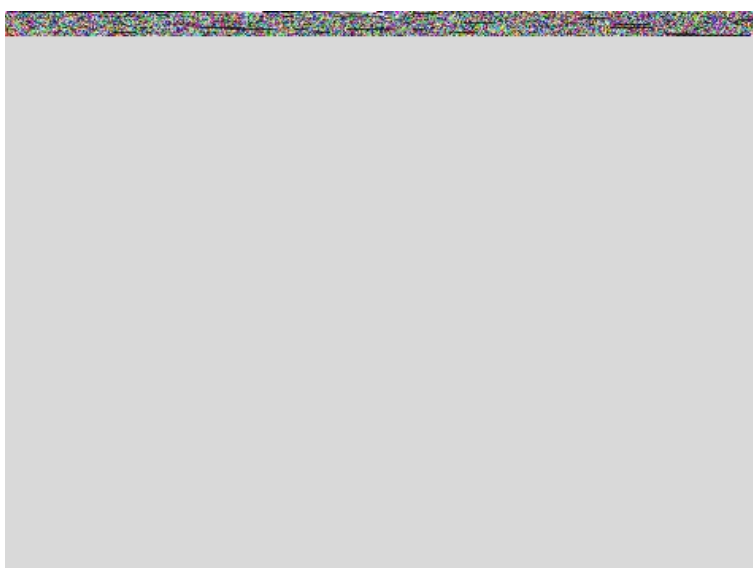

**Fig. S4.** EQE–Voltage curve of the ZnSe:0.03Te/ZnSeS/ZnS fabricated QLED device with a mixed hold-transfer layer of 10%TFB in PVK.

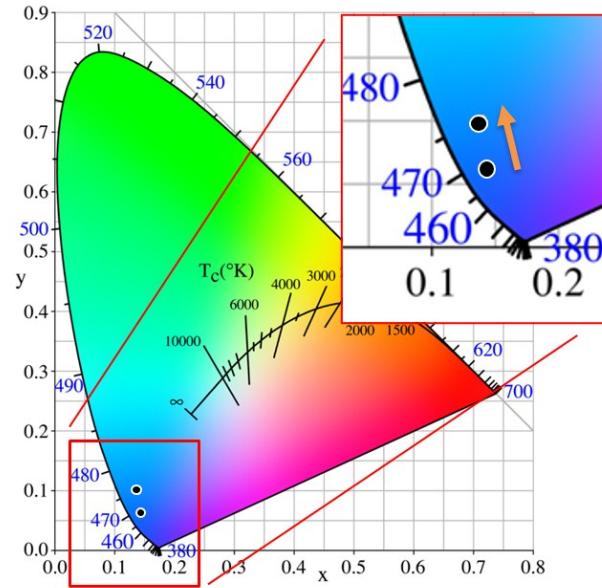

**Fig. S5.** The shift of CIE coordinate between PL and EL in CIE Figure.
